# Supplementary material for: Multi-Omics Reveals Disrupted Immunometabolic Homeostasis and Oxidative Stress in Adipose Tissue of Dairy Cows with Subclinical Ketosis: A Sphingolipid-Centric Perspective
Source: MDPI journal article supplement (doi:10.3390/antiox13050614), 2024-05-17
Supplement: s1 [file s1]

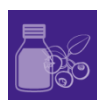

## Supplementary Materials

Table S1. Basic description of selected healthy cows (CON) and subclinical ketosis (SCK) cows<sup>1</sup>

| Item <sup>1</sup>                         | Group       |             | SEM   | P-value |        |              |
|-------------------------------------------|-------------|-------------|-------|---------|--------|--------------|
|                                           | CON (n = 8) | SCK (n = 8) |       | Group   | Time   | Group × Time |
| Postpartum BW (kg) <sup>2</sup>           | 634         | 651         | 4.2   | 0.087   | 0.018  | 0.527        |
| Postpartum BCS <sup>2</sup>               | 3.36        | 3.48        | 0.061 | 0.032   | 0.067  | 0.750        |
| Postpartum DMI (kg) <sup>3</sup>          | 17.7        | 16.2        | 0.04  | 0.064   | <0.001 | 0.469        |
| Milk yield (kg) <sup>3</sup>              | 32.7        | 30.4        | 0.68  | 0.019   | <0.001 | 0.673        |
| Serum BHBA (mmol/L) <sup>4</sup>          | 0.33        | 2.06        | 0.39  | <0.001  | 0.402  | 0.385        |
| DIM at the start of<br>blood sampling (d) | 6.7         | 7.6         | 0.41  | 0.412   | —      | —            |
| DIM of the adipose<br>tissue sampling (d) | 9.7         | 10.6        | 0.43  | 0.412   | —      | —            |

<sup>1</sup>BW = bodyweight; BCS = body condition score; DMI = dry matter intake; BHBA =  $\beta$ -hydroxybutyric acid; DIM = days in milk. <sup>2</sup>BW and BCS were recorded weekly from calving to 30 d postpartum. <sup>3</sup>Milk yield and DMI were recorded daily from calving to 30 d postpartum. <sup>4</sup>Blood sampled by puncture of coccygeal vessels from cows after milk ketone bodies detection, and the serum BHBA on three consecutive days were used for statistical analysis.

**Table S2.** Ingredients and chemical composition of the diet.

| Item <sup>1</sup>                    | Prepartum | Early lactation |
|--------------------------------------|-----------|-----------------|
| Ingredient, % of DM                  |           |                 |
| Corn silage                          | 25.7      | 30.4            |
| Alfalfa silage                       | -         | 7.84            |
| Oat Hay                              | 45.6      | -               |
| Alfalfa hay                          | -         | 10.4            |
| Soybean meal                         | 7.68      | 16.2            |
| Soybean hull                         | 7.74      | 3.65            |
| Crushed corn                         | 3.88      | 9.46            |
| Corn steam flakes                    | -         | 9.30            |
| Whole cottonseed                     | -         | 5.36            |
| Corn gluten meal                     | 4.08      | -               |
| Sugarcane molasses                   | -         | 2.59            |
| DCAD supplement                      | 1.01      | 1.01            |
| Mineral and vitamin mix <sup>2</sup> | 4.31      | 3.70            |
| Chemical composition, % of DM        |           |                 |
| DM, as fed %                         | 51.2      | 47.8            |
| CP                                   | 15.6      | 17.5            |
| NFC <sup>3</sup>                     | 33.2      | 38.5            |
| NDF                                  | 43.5      | 33.2            |
| ADF                                  | 23.5      | 19.3            |
| EE                                   | 3.48      | 5.10            |
| Ash                                  | 5.10      | 5.68            |
| NE <sub>L</sub> (Mcal/kg of DM)      | 1.38      | 1.69            |
| DCAD <sup>4</sup>                    | -98.1     | 291             |

<sup>1</sup>DM = dry matter; DCAD = dietary cation-anion difference; CP = crude protein; NFC = non-fiber carbohydrates; NDF = neutral detergent fiber; ADF = acid detergent fiber; EE = ether extract; NE<sub>L</sub> = net energy for lactation. <sup>2</sup>Prepartum premix: 1 kg of premix included 1,400,000 IU Vitamin A, 437,500 IU Vitamin D, 19,000 IU Vitamin E, 2,000 mg Cu, 3,600 mg Mn, 9,000 mg Zn, 120 mg Se, 160 mg I, 100 mg Co. Early lactation premix: 1 kg of premix included 150,000 IU Vitamin A, 35,000 IU Vitamin D, 2,000 IU Vitamin E, 250 mg Cu, 500 mg Mn, 1,000 mg Zn, 20 mg Se, 40 mg I, 25 mg Co. <sup>3</sup>NFC = DM – (ash + CP + EE + NDF). <sup>4</sup>DCAD (mEq/kg of DM) = (Na + K) – (Cl + S), where the unit of Na, K, Cl, and S is mEq/kg of DM.

**Table S3.** Bovine primers used in conventional real-time PCR analysis

| Gene <sup>1</sup> |   | Sequence <sup>2</sup>    | Accession No.  |
|-------------------|---|--------------------------|----------------|
| <i>ADIPOQ</i>     | F | TGTTCTCTTAATCCTGCCCA     | NM_174742.2    |
|                   | R | CCAACCTGCACAAGTTCCCTT    |                |
| <i>ADIPOR1</i>    | F | AATGGGGCTCCTTCTGGTAAC    | NM_001034055.1 |
|                   | R | GCAGACCTTATACACGAACTCC   |                |
| <i>ADIPOR2</i>    | F | GGAGTGTTCTGTTGGGCTTAGG   | NM_001040499.2 |
|                   | R | GCAGCTCCGGTGATATAGAGG    |                |
| <i>AKT2</i>       | F | ACGTGGTGAATACATCAAGACC   | NM_001206146.2 |
|                   | R | GCTACAGAGAAATTGTTTCAGGGG |                |
| <i>CERS2</i>      | F | ATGCTCCAGACCTTGTATGACT   | NM_001034667.1 |
|                   | R | CTGAGGCTTTGGCATAGACAC    |                |
| <i>CERS5</i>      | F | CCACCCTTTTTGTGATCTTTGGC  | NM_001102132.2 |
|                   | R | CCTGGGTCTAATCCCTCCTGG    |                |
| <i>FASN</i>       | F | AGAGATCCCGAGACGCTTCT     | NM_001012669.1 |
|                   | R | GCTTGGTCCTTTGAAGTCGAAGA  |                |
| <i>LIPE</i>       | F | GATTTACGCACGATGACACAGT   | NM_001040502.2 |
|                   | R | ACCTGCAAAGACATTAGACAGC   |                |
| <i>PRKCZ</i>      | F | CCACGAAGCAGCCATCCATCC    | NM_001077833.2 |
|                   | R | TGATTCAGCGGAGACAGGAGGAG  |                |
| <i>SPTLC1</i>     | F | ACGAGGCTCCAGCATACCAT     | NM_001034749.1 |
|                   | R | TCAGAACGCTCCTGCAACTTG    |                |
| <i>SPTLC2</i>     | F | GTGAGGAACGGGTACTTGAGG    | NM_001099081.2 |
|                   | R | CAACCAGCATGGGTGTTTCTT    |                |
| <i>ACTB</i>       | F | GCCCTGAGGCTCTCTTCCA      | NM_173979.3    |
|                   | R | GCGGATGTCGACGTCACA       |                |
| <i>GAPDH</i>      | F | TTCAACGGCACAGTCAAGG      | NM_001034034.2 |
|                   | R | ACATACTCAGCACCAGCATCAC   |                |
| <i>RPS9</i>       | F | TTCCAGAGCGTTGGCTTAGG     | NM_001101152.2 |
|                   | R | CTCATCCAGCACCCCGATAC     |                |

<sup>1</sup>Primers were designed to measure the abundance of the following transcripts: adiponectin (*ADIPOQ*), adiponectin receptor 1 and 2 (*ADIPOR1* and *ADIPOR2*), AKT serine/threonine kinase 2 (*AKT2*), ceramide synthase 2 and 5 (*CERS2* and *CERS5*), fatty acid synthase (*FASN*), hormone-sensitive lipase (*LIPE*; also called *HSL*), protein kinase C zeta (*PRKCZ*) and serine palmitoyltransferase long chain base subunit 1 and 2 (*SPTLC1* and *SPTLC2*).

<sup>2</sup>Primer sequences are given in a 5' to 3' orientation.

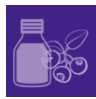

**Table S4.** Differentially expressed genes (top 100 of expression level (TPM)) in the whole blood between CON and SCK cows.

| Gene name | Log2FC(SCK/CON) | <i>P</i> -adjust | Regulate |
|-----------|-----------------|------------------|----------|
| HBB       | 2.694           | 0.012            | up       |
| HBA       | 2.856           | 0.018            | up       |
| CASP1     | 1.157           | 0.047            | up       |
| ISG15     | -2.287          | 0.004            | down     |
| GNLY      | 1.318           | 0.012            | up       |
| MX1       | -1.123          | 0.005            | down     |
| TLR8      | 2.921           | 0.022            | up       |
| CTSW      | 1.256           | 0.011            | up       |
| TLR7      | 1.704           | 0.003            | up       |
| IFITM3    | -1.322          | 0.010            | down     |
| OAS1Y     | -2.317          | 0.002            | down     |
| ALAS2     | 2.553           | 0.011            | up       |
| MX2       | -1.968          | 0.004            | down     |
| REEP1     | 2.665           | 0.024            | up       |
| PRF1      | 1.089           | 0.010            | up       |
| APOBEC3Z1 | -1.156          | 0.007            | down     |
| GZMB      | 1.432           | 0.021            | up       |
| CERS2     | 1.612           | 0.027            | up       |
| NOD1      | 1.661           | 0.004            | up       |
| 5S_rRNA   | 3.834           | 0.038            | up       |
| SPTLC1    | 1.766           | 0.022            | up       |
| PPP1R1B   | -1.266          | 0.037            | down     |
| DHX58     | -1.108          | 0.009            | down     |
| OAS1Z     | -1.234          | 0.021            | down     |
| IL18      | 1.912           | 0.006            | up       |
| DEFB4A    | -1.035          | 0.042            | down     |
| UBA7      | -1.134          | 0.003            | down     |
| HBM       | 2.773           | 0.013            | up       |
| DDX58     | -1.153          | 0.002            | down     |
| IL1B      | 1.505           | 0.013            | up       |
| ADGRG1    | 1.150           | 0.005            | up       |
| SMAD1     | -1.088          | 0.017            | down     |
| MYO1A     | -1.182          | 0.000            | down     |
| DLL1      | -2.217          | 0.007            | down     |
| WEE2      | 1.237           | 0.031            | up       |
| BEX5      | -1.146          | 0.030            | down     |
| GZMM      | 1.699           | 0.005            | up       |
| CAT       | -1.662          | 0.041            | down     |
| IL11RA    | 1.063           | 0.007            | up       |
| SOD1      | -1.745          | 0.029            | down     |

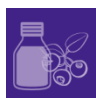

---

|          |        |       |      |
|----------|--------|-------|------|
| TMIGD2   | 1.833  | 0.000 | up   |
| USF1     | -1.249 | 0.012 | down |
| CERK     | -1.673 | 0.000 | down |
| PTX3     | -1.516 | 0.043 | down |
| CPT2     | 1.138  | 0.031 | up   |
| TBXA2R   | -1.546 | 0.023 | down |
| FAM3B    | -1.390 | 0.001 | down |
| MYBPC2   | 1.084  | 0.006 | up   |
| MT1E     | 1.097  | 0.037 | up   |
| WNT9A    | -1.866 | 0.025 | down |
| FSD1     | -1.617 | 0.011 | down |
| TUBA1C   | -1.400 | 0.008 | down |
| IL3RA    | -1.356 | 0.001 | down |
| PTRHD1   | 1.442  | 0.006 | up   |
| RYR1     | -1.395 | 0.000 | down |
| FOXS1    | -1.035 | 0.003 | down |
| PLEKHF1  | 1.169  | 0.011 | up   |
| P2RX5    | -1.212 | 0.040 | down |
| ATP6V0A4 | 1.029  | 0.009 | up   |
| SMIM6    | 1.890  | 0.022 | up   |
| H2AC7    | -1.016 | 0.048 | down |
| CFB      | -1.469 | 0.003 | down |
| CCDC191  | -1.014 | 0.014 | down |
| CHRND    | 1.394  | 0.015 | up   |
| NXPH3    | 1.082  | 0.048 | up   |
| SPTAN1   | 1.135  | 0.019 | up   |
| SYT8     | 1.147  | 0.048 | up   |
| KLF1     | 1.323  | 0.020 | up   |
| MSMB     | 2.608  | 0.006 | up   |
| COL4A2   | -1.869 | 0.000 | down |
| FAIM2    | 1.157  | 0.013 | up   |
| AREG     | -1.289 | 0.002 | down |
| CXCL2    | -1.075 | 0.014 | down |
| ICAM4    | 2.647  | 0.040 | up   |
| FCGR1A   | -1.695 | 0.003 | down |
| CELA1    | 1.309  | 0.004 | up   |
| CP       | 1.362  | 0.035 | up   |
| ME3      | 1.381  | 0.021 | up   |
| MUC13    | -1.081 | 0.002 | down |
| KANK2    | 1.216  | 0.012 | up   |
| CAPN5    | -3.795 | 0.002 | down |
| IFNG     | -2.336 | 0.009 | down |
| AMPH     | 1.065  | 0.000 | up   |
| DOC2A    | -1.039 | 0.004 | down |

---



|         |        |       |      |
|---------|--------|-------|------|
| PRKN    | 1.056  | 0.036 | up   |
| SOD2    | -1.904 | 0.000 | down |
| SLC39A8 | -1.204 | 0.005 | down |
| LTBP4   | -1.784 | 0.041 | down |
| TUBA3E  | 2.766  | 0.034 | up   |
| CSTB    | -2.040 | 0.018 | down |
| EFHD1   | 1.282  | 0.025 | up   |
| PPM1L   | 1.359  | 0.019 | up   |
| CD5L    | 2.049  | 0.048 | up   |
| SGCE    | 3.418  | 0.017 | up   |
| SP6     | 3.692  | 0.008 | up   |
| IGFBP7  | 1.238  | 0.012 | up   |
| RNF39   | 3.812  | 0.000 | up   |
| LYZ2    | 2.039  | 0.001 | up   |
| MYL3    | 1.528  | 0.029 | up   |
| CRYM    | -1.601 | 0.006 | down |

FC: fold change; CON: healthy cows; SCK: subclinical ketosis.



**Table S5.** Differentially expressed genes (top 100 of expression level (TPM)) in the adipose tissue between CON and SCK cows.

| Gene name | Log2FC(SCK/CON) | P-adjust | Regulate |
|-----------|-----------------|----------|----------|
| MYL2      | -19.522         | <0.001   | down     |
| COL1A1    | 1.694           | 0.047    | up       |
| DES       | -4.365          | <0.001   | down     |
| TPM2      | -4.801          | <0.001   | down     |
| COL1A2    | 1.698           | 0.041    | up       |
| COL3A1    | 2.005           | 0.013    | up       |
| ACTA1     | -12.813         | <0.001   | down     |
| TNNC1     | -17.494         | <0.001   | down     |
| FHL1      | -1.438          | 0.048    | down     |
| MUSTN1    | -2.104          | 0.003    | down     |
| TNNC2     | -13.209         | <0.001   | down     |
| ALDOA     | -1.751          | 0.013    | down     |
| MYLPF     | -14.285         | <0.001   | down     |
| CRYAB     | -4.271          | <0.001   | down     |
| CA3       | -16.177         | <0.001   | down     |
| TNNT1     | -12.448         | <0.001   | down     |
| MYL12A    | -1.170          | 0.008    | down     |
| TPM1      | -1.507          | 0.003    | down     |
| CKM       | -14.275         | <0.001   | down     |
| MB        | -12.727         | <0.001   | down     |
| CSRP3     | -17.664         | <0.001   | down     |
| TPM3      | -1.840          | 0.002    | down     |
| MYL6B     | -11.623         | <0.001   | down     |
| YBX3      | -3.093          | 0.002    | down     |
| PDLIM3    | -3.963          | <0.001   | down     |
| TCAP      | -5.874          | <0.001   | down     |
| TNNI2     | -11.278         | <0.001   | down     |
| TNNI1     | -3<0.001        | <0.001   | down     |
| TNNT3     | -8.498          | <0.001   | down     |
| ATF4      | -1.481          | 0.005    | down     |
| KLHL41    | -11.941         | <0.001   | down     |
| MYH7      | -13.986         | <0.001   | down     |
| EEF1A2    | -6.475          | 0.018    | down     |
| PLIN4     | 1.315           | <0.001   | up       |
| JUN       | -1.810          | <0.001   | down     |
| FOS       | -3.153          | <0.001   | down     |
| MYH2      | -17.920         | <0.001   | down     |
| IGFBP6    | 1.137           | 0.020    | up       |
| ACTN2     | -14.694         | <0.001   | down     |
| MYOZ1     | -9.755          | <0.001   | down     |



|         |          |        |      |
|---------|----------|--------|------|
| MFAP5   | 1.183    | 0.016  | up   |
| DUSP1   | -1.674   | <0.001 | down |
| CCNG1   | -1.263   | 0.006  | down |
| MYOT    | -3<0.001 | <0.001 | down |
| NRAP    | -11.411  | <0.001 | down |
| ATP2A1  | -10.037  | <0.001 | down |
| LGALS3  | 1.054    | 0.003  | up   |
| MYOZ2   | -8.233   | <0.001 | down |
| TPI1    | -1.198   | 0.031  | down |
| HSPB6   | -3.141   | 0.003  | down |
| COX17   | -1.347   | 0.009  | down |
| HSPB8   | -2.592   | 0.009  | down |
| LDHA    | -2.170   | 0.004  | down |
| EGR1    | -3.265   | <0.001 | down |
| JUNB    | -2.127   | <0.001 | down |
| LDB3    | -6.778   | <0.001 | down |
| KIF1C   | -1.094   | 0.033  | down |
| ZFP36   | -1.545   | 0.001  | down |
| HSPB7   | -8.114   | <0.001 | down |
| MYBPC1  | -16.154  | <0.001 | down |
| ACKR3   | 1.053    | 0.040  | up   |
| PYGM    | -8.684   | <0.001 | down |
| PPP1R27 | -12.336  | <0.001 | down |
| VDAC3   | -1.545   | 0.011  | down |
| EIF3M   | -1.013   | <0.001 | down |
| BIN1    | -2.780   | 0.006  | down |
| PTI     | 1.816    | 0.011  | up   |
| CXCL3   | -2.561   | <0.001 | down |
| SLC25A4 | -2.588   | <0.001 | down |
| CFL2    | -1.997   | 0.001  | down |
| GYG1    | -1.439   | 0.012  | down |
| ENO3    | -5.748   | <0.001 | down |
| APOBEC2 | -7.273   | <0.001 | down |
| MRPL33  | -1.370   | 0.015  | down |
| CASQ1   | -7.564   | <0.001 | down |
| PRSS23  | -1.387   | 0.004  | down |
| SPP1    | 2.859    | 0.004  | up   |
| TMOD4   | -7.526   | <0.001 | down |
| SLN     | -14.307  | <0.001 | down |
| NDUFA4  | -1.204   | 0.024  | down |
| MSRB1   | -1.859   | 0.004  | down |
| FUNDC2  | -1.044   | 0.018  | down |
| SMPX    | -13.923  | <0.001 | down |
| CYB5R1  | -2.761   | <0.001 | down |





---

|         |         |        |      |
|---------|---------|--------|------|
| NDUFV2  | -1.164  | 0.022  | down |
| MACROD1 | -3.842  | <0.001 | down |
| SYNGR2  | -1.679  | 0.004  | down |
| CD276   | 1.213   | 0.012  | up   |
| UGP2    | -1.026  | 0.010  | down |
| ARPP19  | -1.114  | 0.008  | down |
| RYS1    | -8.249  | <0.001 | down |
| IER2    | -1.253  | 0.021  | down |
| NMRK2   | -12.813 | 0.001  | down |
| PGM1    | -1.694  | 0.004  | down |
| ACTC1   | -12.061 | <0.001 | down |
| ZFAND5  | -1.193  | 0.038  | down |
| CCN1    | -1.722  | <0.001 | down |
| GOT2    | -2.222  | 0.001  | down |
| PALMD   | -1.449  | 0.003  | down |
| ATP2A2  | -2.174  | 0.001  | down |

---

FC: fold change; CON: healthy cows; SCK: subclinical ketosis.

**Table S6.** Differential lipid species in the serum samples between CON and SCK cows.

| Lipid species           | VIP   | <i>P</i> -value | Log2FC(SCK/CON) | Regulate |
|-------------------------|-------|-----------------|-----------------|----------|
| Cer(d16:0/18:0)         | 4.665 | 0.019           | 0.261           | Up       |
| Cer(d24:0/18:0)         | 4.250 | 0.004           | 0.240           | Up       |
| Cer(d18:1/22:0)         | 4.298 | 0.020           | 0.174           | Up       |
| Cer(t18:0/18:0)         | 4.429 | 0.008           | 0.168           | Up       |
| SM(t18:1/14:0)          | 4.265 | 0.015           | 0.166           | Up       |
| Cer(d18:0/24:0)         | 1.631 | 0.046           | 0.148           | Up       |
| Cer(d18:1/24:0)         | 3.939 | 0.016           | 0.143           | Up       |
| Cer(d18:0/22:0)         | 1.467 | 0.029           | 0.136           | Up       |
| SM(d18:0/18:0)          | 1.567 | 0.046           | 0.135           | Up       |
| SM(d20:0/24:2)          | 1.761 | 0.038           | 0.135           | Up       |
| SM(d18:0/16:0)          | 1.587 | 0.031           | 0.119           | Up       |
| SM(d16:1/12:0)          | 2.113 | 0.020           | 0.109           | Up       |
| SM(d20:0/24:3)          | 1.954 | 0.015           | 0.107           | Up       |
| PC(19:1/18:2)           | 3.768 | 0.012           | 0.105           | Up       |
| Cer(d18:0/23:0)         | 1.843 | 0.026           | 0.096           | Up       |
| SM(d18:2/20:5)          | 1.884 | 0.029           | 0.084           | Up       |
| SM(t18:1/12:0)          | 1.904 | 0.038           | 0.082           | Up       |
| SM(d18:1/13:0)          | 2.073 | 0.036           | 0.077           | Up       |
| MGMG(39:0)              | 1.574 | 0.044           | 0.067           | Up       |
| LdMePE(18:2)            | 1.991 | 0.024           | 0.053           | Up       |
| MLCL(14:2/18:2/18:2)    | 2.054 | 0.015           | 0.045           | Up       |
| LPC(18:2)               | 2.419 | 0.024           | 0.035           | Up       |
| MLCL(18:2/14:1/18:1)    | 1.688 | 0.032           | 0.029           | Up       |
| LPC(18:1)               | 2.189 | 0.020           | 0.029           | Up       |
| PC(18:1/22:6)           | 1.746 | 0.050           | 0.028           | Up       |
| CL(18:2/16:0/16:0/24:1) | 1.275 | 0.043           | 0.024           | Up       |
| SM(d17:1/18:1)          | 1.271 | 0.042           | -0.016          | Down     |
| TG(18:4/16:0/16:0)      | 1.311 | 0.027           | -0.017          | Down     |
| SM(d17:0/16:0)          | 1.513 | 0.034           | -0.018          | Down     |
| PE(18:1p/20:4)          | 1.355 | 0.033           | -0.020          | Down     |
| TG(16:0/16:1/16:1)      | 1.473 | 0.035           | -0.021          | Down     |
| Hex1Cer(d24:1/18:0)     | 1.268 | 0.004           | -0.021          | Down     |
| PE(18:0/18:1)           | 1.214 | 0.016           | -0.022          | Down     |
| PE(16:0/18:1)           | 1.120 | 0.027           | -0.023          | Down     |
| PC(8:0/11:2)            | 1.428 | 0.025           | -0.024          | Down     |
| PC(18:3e/17:0)          | 1.712 | 0.023           | -0.025          | Down     |
| CL(18:2/18:0/18:1/20:0) | 1.542 | 0.007           | -0.026          | Down     |
| PC(8:0/11:1)            | 1.687 | 0.015           | -0.026          | Down     |
| CL(22:3/18:0/18:0/20:4) | 1.529 | 0.039           | -0.026          | Down     |
| PC(16:1e/17:0)          | 1.183 | 0.048           | -0.028          | Down     |
| PC(32:1/20:4)           | 1.439 | 0.048           | -0.028          | Down     |

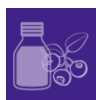

|                         |       |       |        |      |
|-------------------------|-------|-------|--------|------|
| PC(11:0/22:4)           | 1.601 | 0.041 | -0.028 | Down |
| PE(18:0e/18:2)          | 1.078 | 0.032 | -0.029 | Down |
| CL(18:2/16:0/16:0/20:1) | 1.330 | 0.048 | -0.029 | Down |
| SM(t18:1/21:4)          | 1.799 | 0.022 | -0.029 | Down |
| ChE(20:3)               | 1.859 | 0.014 | -0.029 | Down |
| SiE(18:3)               | 1.859 | 0.014 | -0.029 | Down |
| MePC(12:1e/23:0)        | 1.776 | 0.016 | -0.030 | Down |
| PC(18:0e/20:4)          | 1.776 | 0.016 | -0.030 | Down |
| SPH(t16:0)              | 1.610 | 0.036 | -0.031 | Down |
| CL(18:1/18:0/18:0/20:0) | 1.537 | 0.002 | -0.032 | Down |
| PS(20:0e/18:2)          | 1.308 | 0.022 | -0.032 | Down |
| CL(22:3/16:0/16:0/20:4) | 1.768 | 0.008 | -0.034 | Down |
| PC(31:1/20:4)           | 1.615 | 0.013 | -0.036 | Down |
| PE(16:0/20:4)           | 1.837 | 0.006 | -0.037 | Down |
| MePC(15:0/10:3)         | 2.251 | 0.036 | -0.043 | Down |
| PC(4:0/13:0)            | 2.169 | 0.002 | -0.043 | Down |
| PE(16:0/18:3)           | 1.181 | 0.023 | -0.045 | Down |
| TG(16:0/18:3/18:3)      | 1.825 | 0.032 | -0.048 | Down |
| PE(16:0/20:5)           | 1.510 | 0.025 | -0.048 | Down |
| PS(20:1e/20:4)          | 1.688 | 0.010 | -0.050 | Down |
| LPE(22:4)               | 1.452 | 0.040 | -0.050 | Down |
| PS(20:0e/20:4)          | 2.097 | 0.013 | -0.051 | Down |
| MePC(18:1e/18:2)        | 2.191 | 0.033 | -0.052 | Down |
| SM(d18:1/24:3)          | 2.424 | 0.005 | -0.054 | Down |
| PC(20:4e/19:1)          | 2.539 | 0.015 | -0.055 | Down |
| ChE(22:4)               | 2.608 | 0.002 | -0.057 | Down |
| dMePE(16:0/20:5)        | 1.823 | 0.029 | -0.058 | Down |
| TG(16:2e/10:4/18:0)     | 2.155 | 0.036 | -0.058 | Down |
| PE(16:1e/22:4)          | 1.757 | 0.008 | -0.060 | Down |
| PE(18:0/22:4)           | 1.971 | 0.008 | -0.061 | Down |
| PE(16:1e/18:2)          | 1.657 | 0.011 | -0.063 | Down |
| FA(20:4)                | 2.461 | 0.004 | -0.066 | Down |
| PS(18:0e/22:4)          | 1.826 | 0.045 | -0.072 | Down |
| PS(20:0e/22:4)          | 2.332 | 0.007 | -0.083 | Down |
| CL(18:3/18:0/18:2/20:0) | 2.045 | 0.025 | -0.104 | Down |
| BisMePA(20:1/20:2)      | 3.660 | 0.023 | -0.145 | Down |

VIP: variable importance in the projection; FC: fold change; CON: healthy cows; SCK: subclinical ketosis.

**Table S7.** Differential lipid species in the adipose tissue samples between CON and SCK cows.

| Lipid species           | VIP   | <i>P</i> -value | Log2FC(SCK/CON) | Regulate |
|-------------------------|-------|-----------------|-----------------|----------|
| Cer(d18:2/20:0)         | 3.425 | 0.013           | 0.217           | Up       |
| SM(d18:1/16:0)          | 3.504 | 0.020           | 0.175           | Up       |
| Cer(t18:0/18:0)         | 4.477 | 0.011           | 0.162           | Up       |
| Cer(d18:1/24:0)         | 4.229 | 0.016           | 0.156           | Up       |
| SM(d18:1/24:0)          | 3.690 | 0.039           | 0.142           | Up       |
| TG(10:0/23:0/24:0)      | 2.367 | 0.044           | 0.133           | Up       |
| SM(d18:1/22:0)          | 3.605 | 0.017           | 0.111           | Up       |
| Cer(d17:0/16:0)         | 1.869 | 0.046           | 0.109           | Up       |
| Cer(d18:1/17:0)         | 1.463 | 0.041           | 0.089           | Up       |
| CL(18:2/16:0/16:0/22:1) | 2.013 | 0.002           | 0.089           | Up       |
| SM(d18:0/16:0)          | 2.976 | 0.021           | 0.080           | Up       |
| SM(d18:1/18:3)          | 2.376 | 0.031           | 0.079           | Up       |
| PE(17:0/18:2)           | 1.672 | 0.006           | 0.074           | Up       |
| Cer(d18:1/16:0)         | 2.232 | 0.048           | 0.073           | Up       |
| Cer(d16:0/12:0)         | 3.205 | 0.020           | 0.058           | Up       |
| TG(16:0/14:1/20:4)      | 1.831 | 0.039           | 0.050           | Up       |
| Hex1Cer(d18:1/16:0)     | 1.759 | 0.003           | 0.048           | Up       |
| SM(d18:2/16:0)          | 1.909 | 0.046           | 0.048           | Up       |
| SM(d18:1/20:3)          | 1.402 | 0.047           | 0.045           | Up       |
| TG(16:0/18:1/20:4)      | 1.788 | 0.040           | 0.045           | Up       |
| TG(18:4/14:0/18:1)      | 1.421 | 0.015           | 0.036           | Up       |
| MGDG(14:0e/16:0)        | 1.372 | 0.008           | 0.035           | Up       |
| PC(16:1/18:2)           | 1.356 | 0.035           | 0.034           | Up       |
| Cer(d16:0/18:0)         | 1.440 | 0.037           | 0.033           | Up       |
| TG(8:0/10:2/18:1)       | 1.483 | 0.021           | 0.030           | Up       |
| Cer(d16:0/18:0+O)       | 1.301 | 0.028           | 0.029           | Up       |
| Cer(t18:0/16:0)         | 1.301 | 0.028           | 0.029           | Up       |
| Cer(d16:0/16:0)         | 1.335 | 0.038           | 0.027           | Up       |
| MePC(12:1e/20:4)        | 1.387 | 0.042           | 0.026           | Up       |
| CL(18:2/18:0/18:1/20:0) | 1.088 | 0.033           | 0.025           | Up       |
| PC(16:0/16:0)           | 1.199 | 0.033           | 0.024           | Up       |
| CL(18:1/18:0/18:0/20:0) | 1.068 | 0.003           | 0.019           | Up       |
| CL(22:3/18:0/18:0/20:4) | 1.010 | 0.028           | 0.017           | Up       |
| TG(18:3e/14:1/18:4)     | 1.115 | 0.003           | 0.014           | Up       |
| MePC(14:0e/18:2)        | 1.219 | 0.033           | -0.036          | Down     |
| PC(14:0e/18:2)          | 1.235 | 0.039           | -0.043          | Down     |
| Cer(d18:1/18:0)         | 1.516 | 0.045           | -0.045          | Down     |
| PC(16:0/19:0)           | 2.550 | 0.018           | -0.048          | Down     |
| PS(18:0e/18:1)          | 1.528 | 0.028           | -0.050          | Down     |
| PC(17:0/20:4)           | 1.524 | 0.015           | -0.051          | Down     |
| Cer(d15:0/26:2)         | 1.386 | 0.036           | -0.052          | Down     |

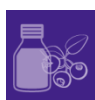

|                       |       |       |        |      |
|-----------------------|-------|-------|--------|------|
| PE(18:0/22:5)         | 1.343 | 0.040 | -0.053 | Down |
| PC(16:2e/18:1)        | 1.954 | 0.045 | -0.058 | Down |
| MePC(16:0e/18:2)      | 1.750 | 0.009 | -0.061 | Down |
| PC(20:0/18:1)         | 1.750 | 0.019 | -0.061 | Down |
| MePC(15:0/18:1)       | 1.795 | 0.011 | -0.061 | Down |
| Cer(d16:0/21:1)       | 1.518 | 0.024 | -0.066 | Down |
| PE(16:0p/18:2)        | 1.752 | 0.010 | -0.067 | Down |
| PC(16:1e/23:0)        | 1.880 | 0.001 | -0.074 | Down |
| PC(11:0/20:2)         | 1.536 | 0.029 | -0.075 | Down |
| PC(18:1e/16:0)        | 2.616 | 0.000 | -0.076 | Down |
| PC(15:0/16:0)         | 2.189 | 0.019 | -0.077 | Down |
| PC(16:0/13:0)         | 2.249 | 0.022 | -0.081 | Down |
| PS(17:0/18:1)         | 2.015 | 0.032 | -0.095 | Down |
| PE(19:1/18:1)         | 2.326 | 0.037 | -0.098 | Down |
| PE(20:0/18:1)         | 2.836 | 0.009 | -0.112 | Down |
| PC(18:0e/22:5)        | 1.924 | 0.032 | -0.120 | Down |
| LPC(16:0e)            | 2.740 | 0.012 | -0.121 | Down |
| LPC(18:0e)            | 2.286 | 0.044 | -0.123 | Down |
| Hex1Cer(d18:1/22:0)   | 1.904 | 0.009 | -0.128 | Down |
| PC(18:1e/22:6)        | 2.009 | 0.049 | -0.132 | Down |
| PE(20:1e/20:4)        | 2.298 | 0.044 | -0.134 | Down |
| PE(20:4e/15:0)        | 3.125 | 0.002 | -0.147 | Down |
| TG(18:1e/14:0/16:0)   | 3.362 | 0.011 | -0.156 | Down |
| PC(18:3e/18:1)        | 2.315 | 0.005 | -0.158 | Down |
| LPC(18:1e)            | 2.741 | 0.018 | -0.159 | Down |
| PE(18:1p/20:1)        | 3.166 | 0.042 | -0.161 | Down |
| PI(18:0/20:2)         | 2.207 | 0.008 | -0.167 | Down |
| Hex1Cer(d18:1/24:0)   | 2.495 | 0.029 | -0.171 | Down |
| TG(18:2/17:1/18:2)    | 1.538 | 0.023 | -0.197 | Down |
| PE(18:2/18:2)         | 1.595 | 0.016 | -0.199 | Down |
| PE(18:1p/20:4)        | 3.407 | 0.020 | -0.204 | Down |
| PE(18:2e/20:4)        | 2.891 | 0.019 | -0.208 | Down |
| PE(20:4e/13:0)        | 3.582 | 0.005 | -0.218 | Down |
| PI(18:1/20:3)         | 2.629 | 0.002 | -0.220 | Down |
| Hex1Cer(d19:2/23:0+O) | 3.562 | 0.027 | -0.232 | Down |
| PC(20:2/22:6)         | 2.423 | 0.024 | -0.244 | Down |
| PC(26:1/10:1)         | 4.391 | 0.000 | -0.248 | Down |
| Hex1Cer(t18:0/18:1)   | 3.169 | 0.010 | -0.294 | Down |

VIP: variable importance in the projection; FC: fold change; CON: healthy cows; SCK: subclinical ketosis.

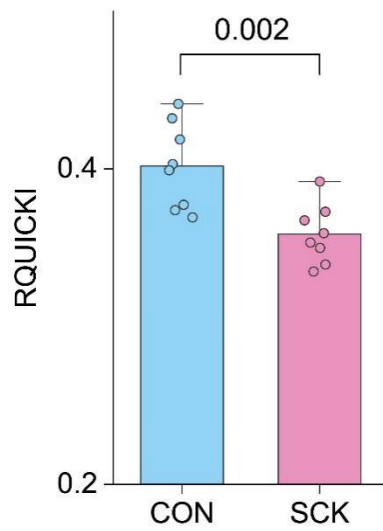

**Figure S1.** Revised quantitative insulin sensitivity check index (RQUICKI) of health cows and subclinical ketosis cows. CON: healthy cows; SCK: subclinical ketosis.

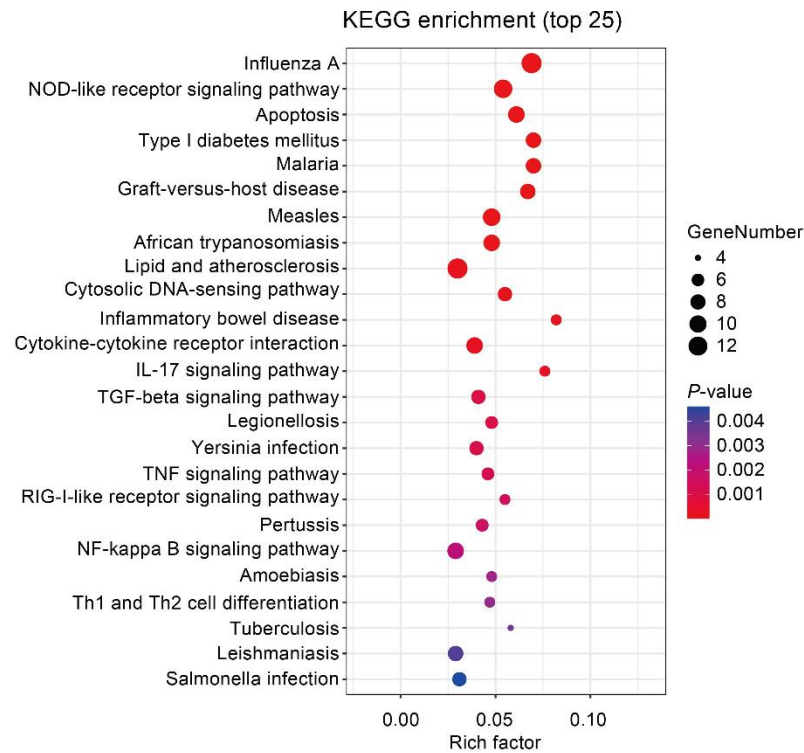

Figure S2. KEGG pathway enrichment analysis of whole blood (top 25 terms).

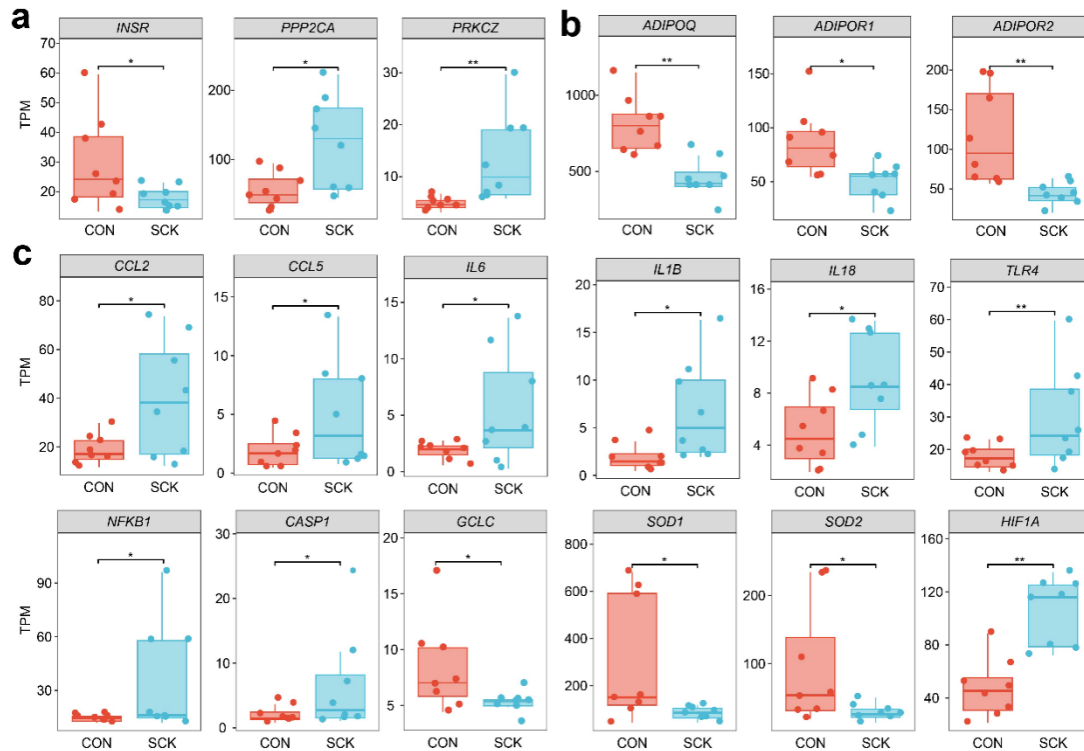

**Figure S3.** Representative differential genes in adipose tissue. Transcripts per million (TPM) of selected gene representatives of (a) insulin signaling pathway, (b) adiponectin production, and (c) inflammatory and oxidative response. DESeq2 package was used to identify the DEGs using a cutoff threshold of adj.  $P < 0.05$  and fold change (FC)  $> 2$ . The asterisks indicate statistically significant differences and correspond to  $*P < 0.05$ ,  $**P < 0.01$ , and  $***P < 0.001$ . CON: healthy cows; SCK: subclinical ketosis.



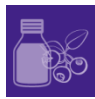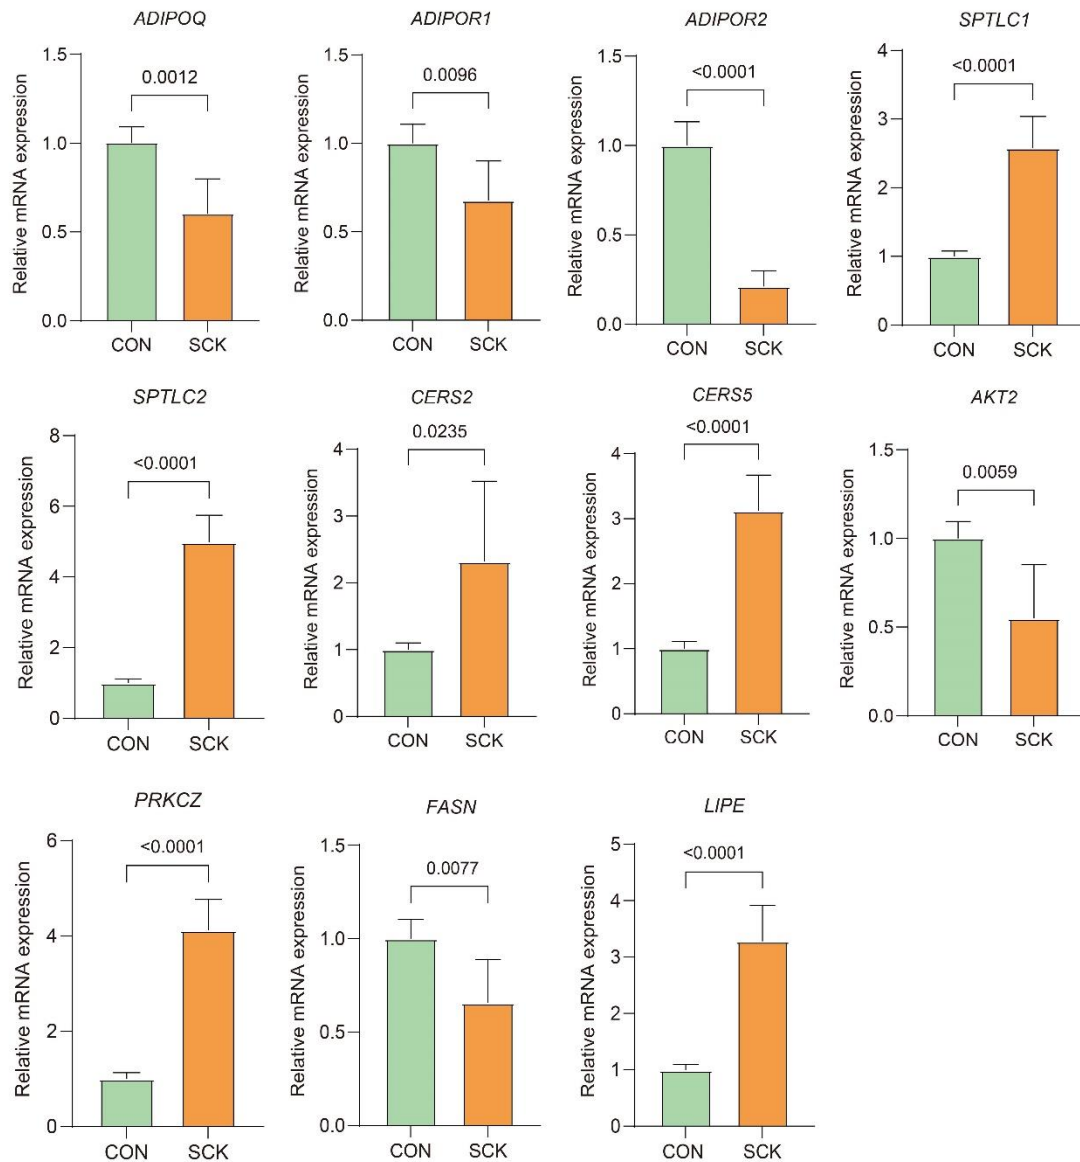

**Figure S4.** Validation of adipose tissue differential gene expression of RNA-seq by qPCR. CON: healthy cows; SCK: subclinical ketosis.

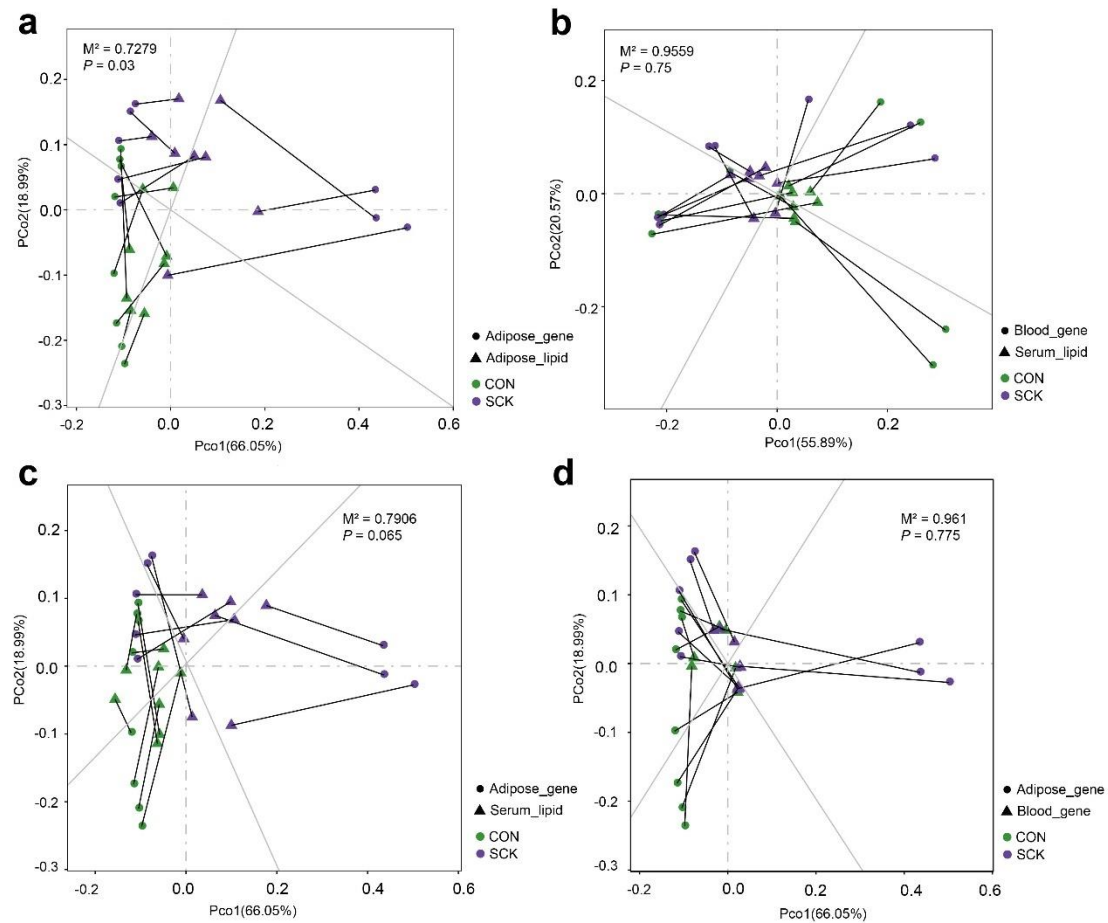

**Figure S5.** Procrustes analysis of the relationship between differential lipid features and differentially expressed gene (DEG). (a) Procrustes analysis of differential lipids and DEG in adipose tissue. (b) Procrustes analysis of serum differential lipids and blood DEG. (c) Procrustes analysis of serum differential lipids and DEG in adipose tissue. (d) Procrustes analysis of blood DEG and adipose tissue DEG. The correlation is considered significant when  $P < 0.05$ . CON: healthy cows; SCK: subclinical ketosis.

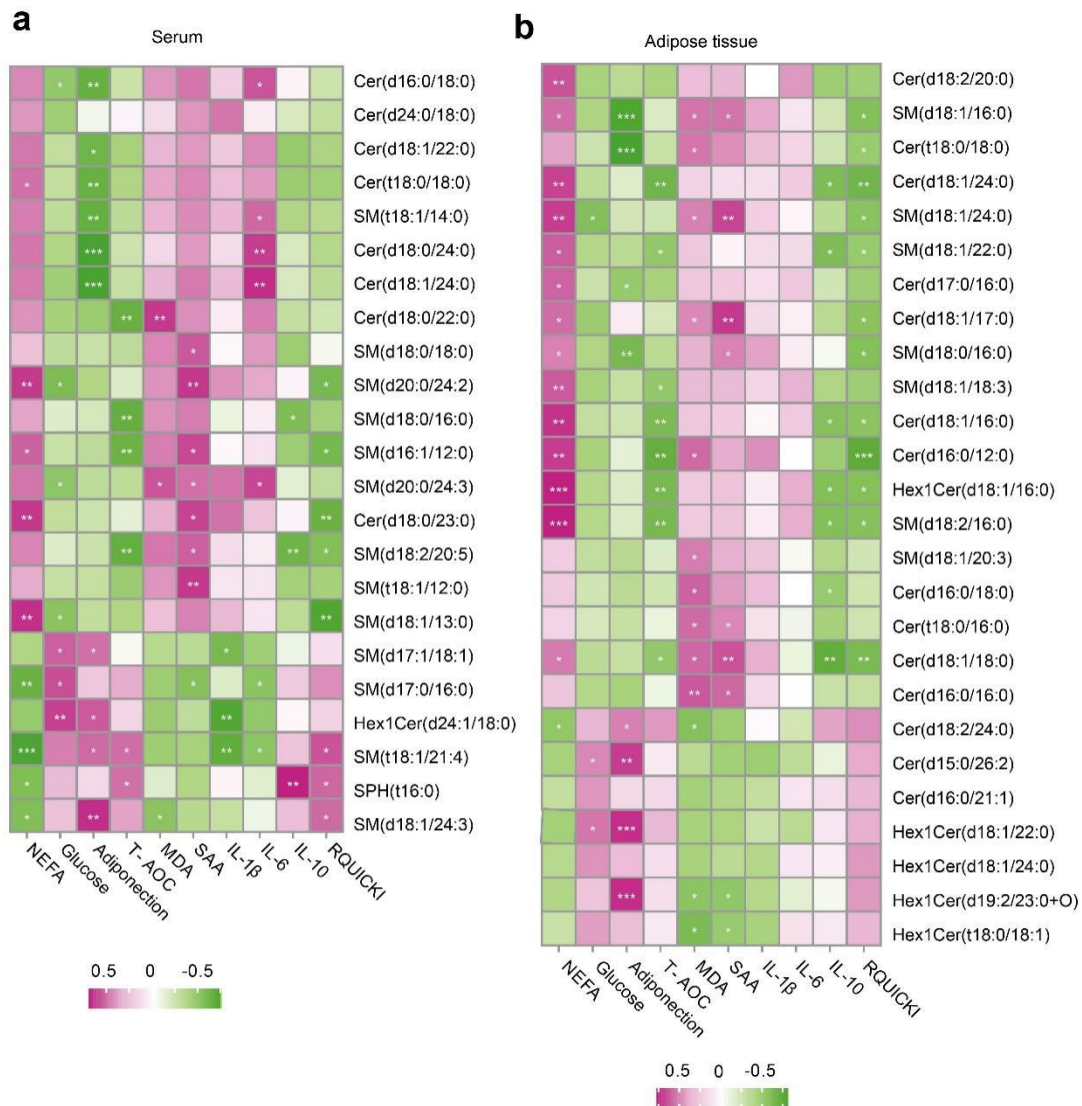

**Figure S6.** Heatmap of association between serum biochemical parameter and differential sphingolipids in serum (a) and adipose tissue (b). The asterisks indicate statistically significant differences and correspond to \* $P < 0.05$ , \*\*  $P < 0.01$ , and \*\*\*  $P < 0.001$ . NEFA: nonesterified fatty acids; T-AOC: total antioxidant capacity; SOD: superoxide dismutase; MDA: malonaldehyde; MDA: malonaldehyde; RQUICKI: revised quantitative insulin sensitivity check index.
